# Supplementary material for: Structural and magnetic investigations of a binuclear coordination compound of dysprosium(iii) dinitrobenzoate
Source: Royal Society of Chemistry journal article supplement (doi:10.1039/c8dt04253e), 2019-01-01
Supplement: c8dt04253e1.pdf [file c8dt04253e1.pdf]

## Supporting Information for

### Structural and Magnetic Investigations of a Binuclear Coordination Compound of Dysprosium (III) Dinitrobenzoate .

Balkaran Singh Sran,<sup>a</sup> Jessica Flores Gonzalez,<sup>b</sup> Vincent Montigaud,<sup>b</sup> Boris Le Guennic,<sup>b</sup> Fabrice Pointillart\*,<sup>b</sup> Olivier Cador\*,<sup>b</sup> Geeta Hundal\*<sup>a</sup>

<sup>a</sup> Department of Chemistry, UGC sponsored centre of advance studies-II, Guru Nanak Dev University, Amritsar-143005, Punjab, India.

<sup>b</sup> Univ Rennes, CNRS, ISCR (Institut des Sciences Chimiques de Rennes) - UMR 6226, 35000 Rennes, France.

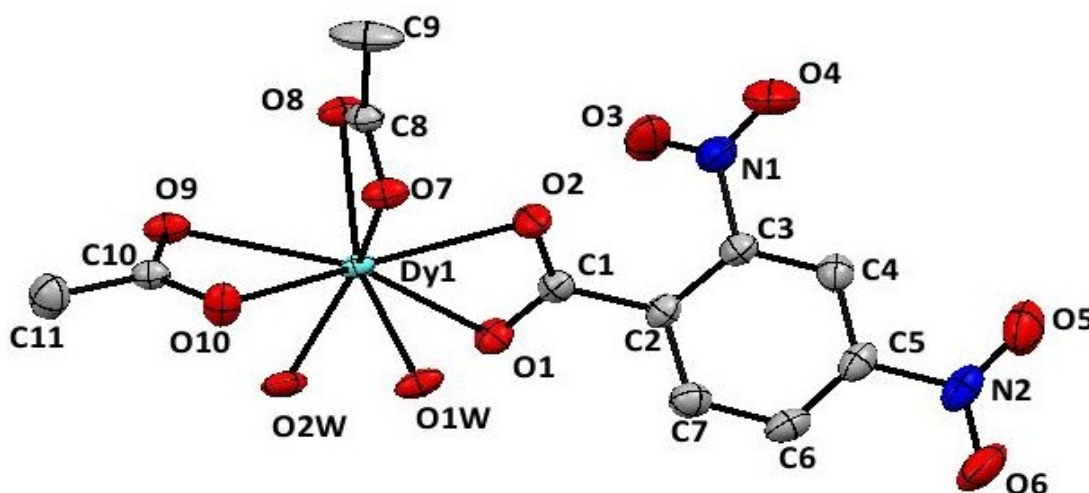

**Fig. S1** ORTEP diagram showing asymmetric unit of Dy complex with 40 % ellipsoid probability. Hydrogen atoms are omitted for clarity

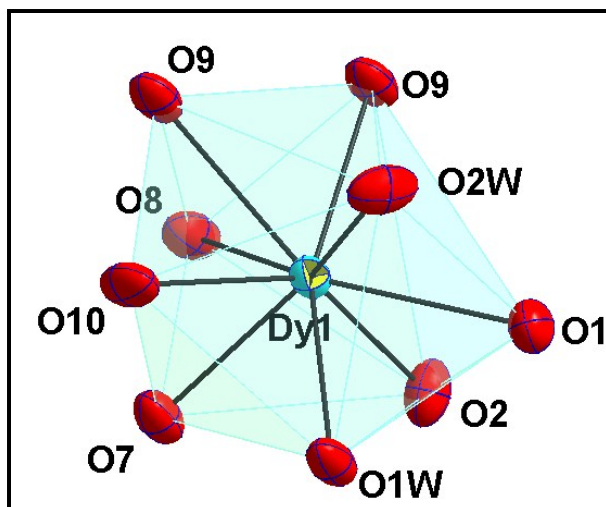

Fig. S2 Showing the Polyhedron around the metal ion.

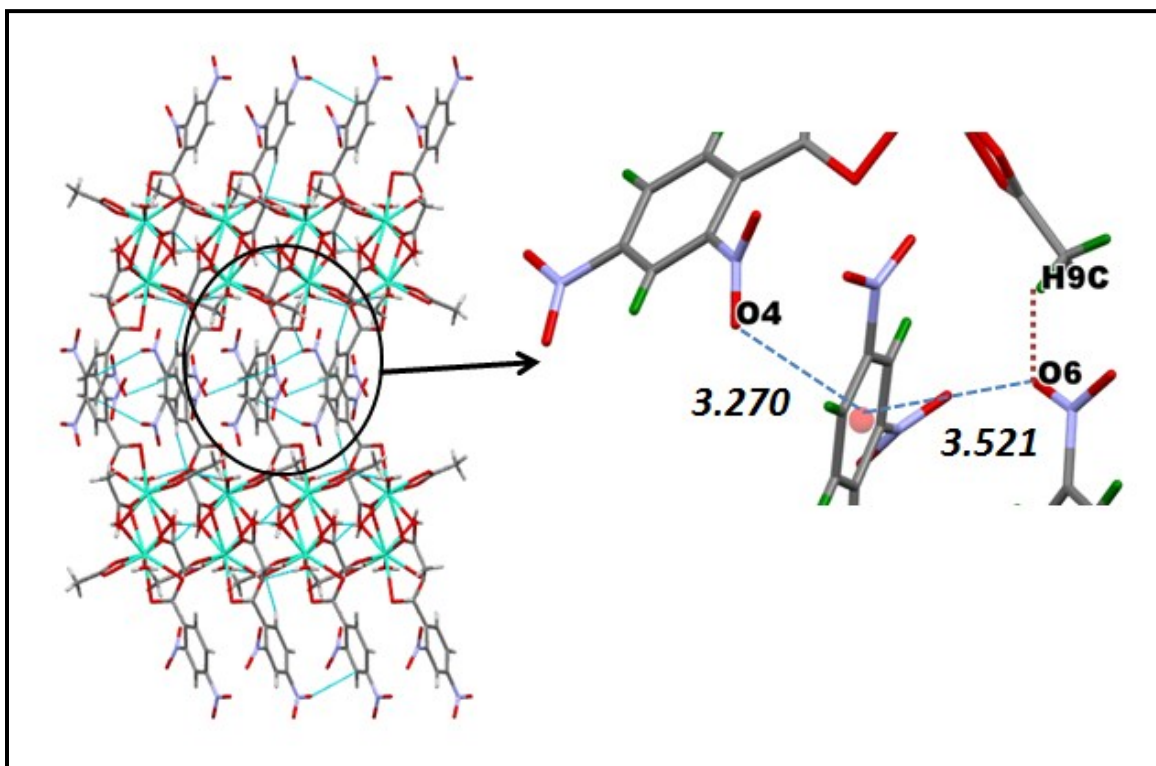

Fig.S3 Showing intermolecular hydrogen bonding (dotted magenta coloured line) and Lone pair-- $\pi$  interactions (dotted blue coloured line) between different chains along  $a$  axis ( $bc$  plane).

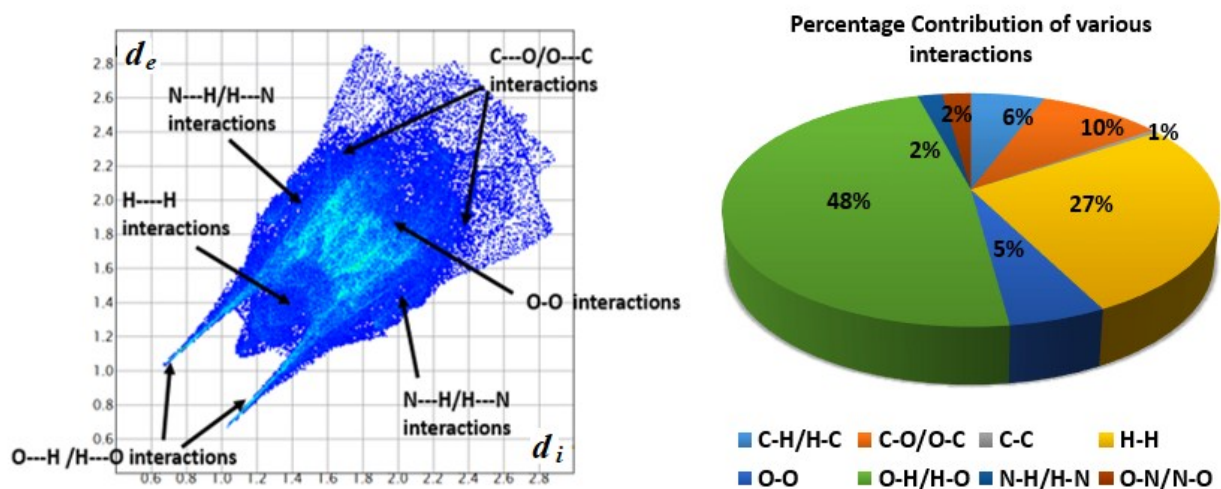

**Fig. S4** 2D fingerprint plots for **1**,  $d_e$  and  $d_i$  are the distances to the nearest atom centre exterior and interior to the surface, respectively (left). Pie plot showing percentage share of various interactions to the Hirshfeld surface (right).

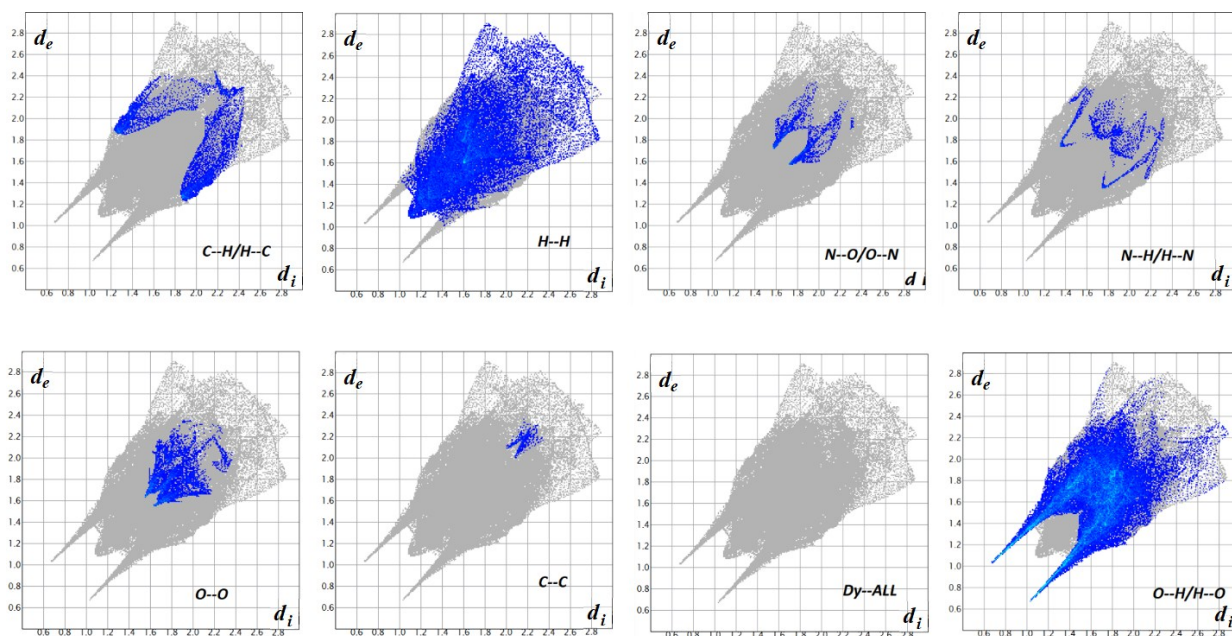

**Fig. S5** Fingerprint plots of C-H/H-C, H-H, N-O/O-N, N-H/H-N, O-O, C-C, Dy-All and O-H/H-O pairs. The grey shadow outlines the total fingerprint in **1**.

## IR Spectroscopy

The IR spectrum of **1** shows a band for OH at  $3348\text{ cm}^{-1}$ , characteristic peaks of asymmetric and symmetric stretches of  $\text{COO}^-$  at  $1546\text{ cm}^{-1}$  and  $1377\text{ cm}^{-1}$ , respectively.  $\Delta\nu = \nu_{\text{asym}}(\text{COO}^-) - \nu_{\text{sym}}(\text{COO}^-)$  is less than  $200\text{ cm}^{-1}$  which clearly indicates that ligand binds with the metal centre in a bidentate chelate mode.<sup>1</sup> The compound contains an aromatic N-O stretch around  $1349\text{ cm}^{-1}$  and a weak band around  $617\text{ cm}^{-1}$  that is assigned to M-O vibrations (Fig. S7).

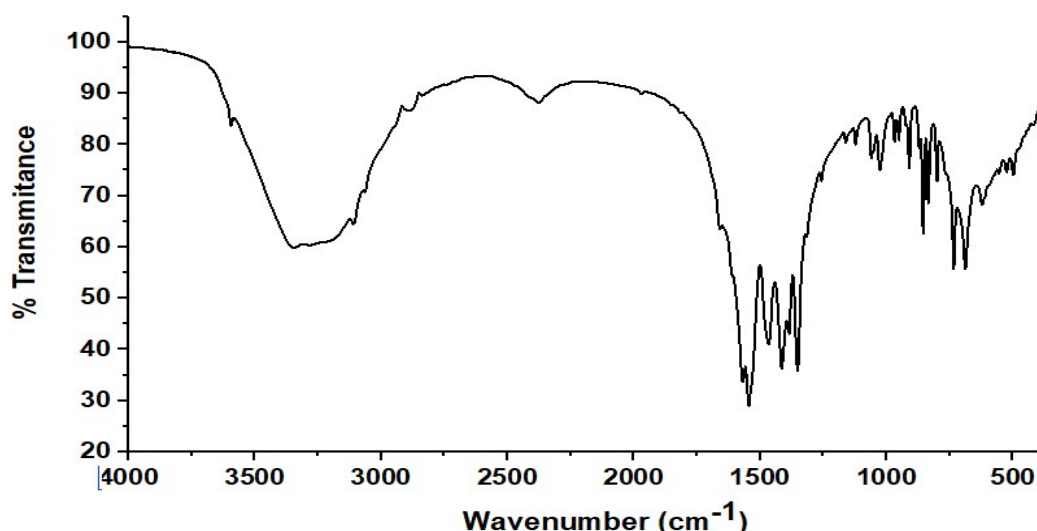

Fig. S6 IR spectra of complex **1**.

- 1 M. I. Azócar, H. Muñoz, P. Levin, N. Dinamarca, G. Gómez, A. Ibañez, M. T. Garland and M. A. Paez, *Commun. Inorg. Synth.* 2013, **1**, 19-21.

## Thermogravimetric analysis

The thermal stability of Dy (III) complex was examined by TGA (Fig. S8). In a general manner, Complex loses four coordinated water molecules between  $120$  and  $183\text{ }^\circ\text{C}$ , endothermically (calculated weight loss,  $6.7\%$ ; observed weight loss,  $6.2\%$ ). Beyond this temperature there is a weight loss between  $254^\circ\text{C}$  and  $418^\circ\text{C}$  corresponding to the loss of DNB molecules (Calculated weight loss,  $39.8\%$ ; observed weight loss,  $40.2\%$ ), remaining organic part is lost up to  $800\text{ }^\circ\text{C}$  leaving behind  $\text{Dy}_2\text{O}_3$  ( $35.8\%$ ) as residue.

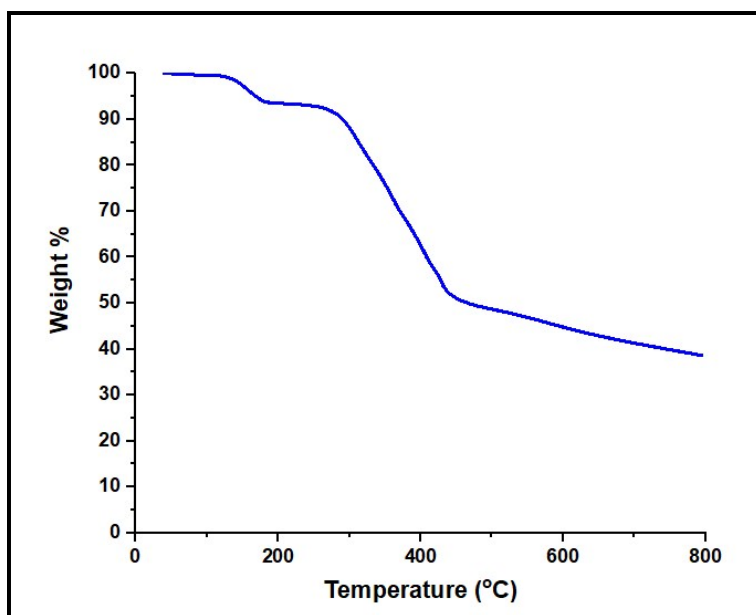

**Fig. S7** TGA analysis for **1**.

#### **Powder X-ray Diffraction studies**

In order to confirm that the single crystal structure of compounds **1** corresponds to the bulk material as well as its phase purity, the powder X-ray data were recorded at room temperature. The experimental and simulated (from the single crystal data) patterns are shown in Fig. S6, providing a very good match between the two.

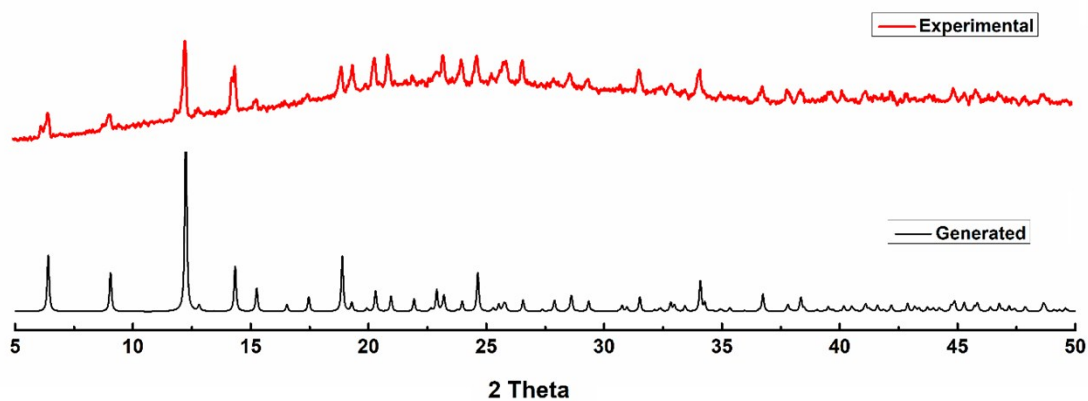

**Fig. S8** Generated (black) and experimental (red) PXRD spectrum of complex **1**

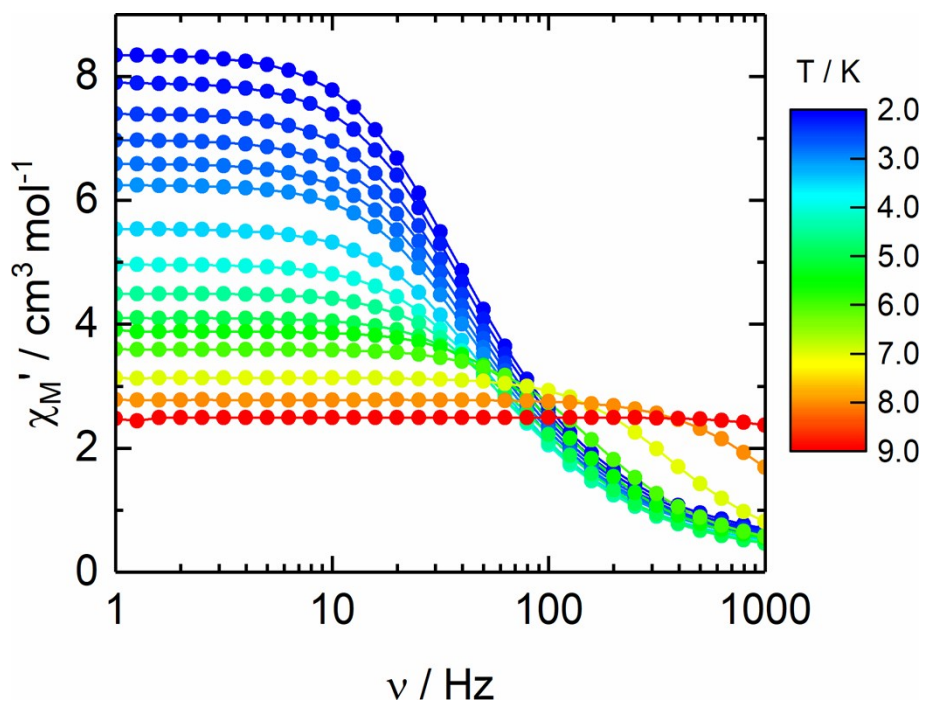

**Fig. S9** Frequency dependence of  $\chi_M'$  of **1** from 2 to 15K under zero- applied magnetic field.

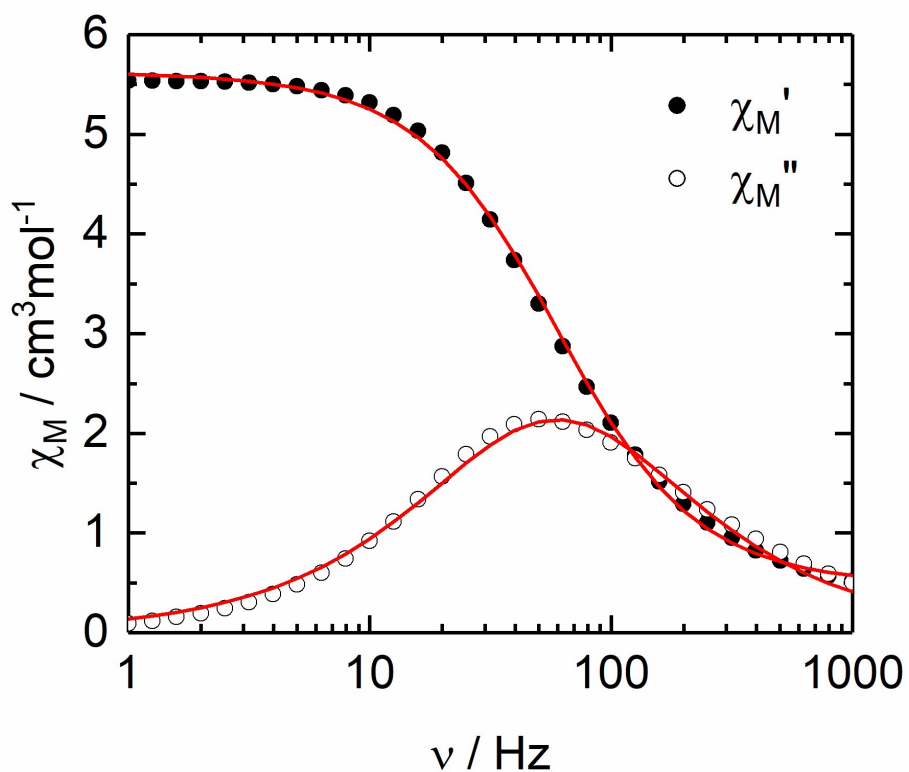

**Fig. S10** Frequency dependence of the in-phase ( $\chi_M'$ ) and out-of-phase ( $\chi_M''$ ) components of the ac susceptibility measured on powder at 3.5 K in zero dc field with the best fitted curves (red lines) for **1** with the extended Debye model (see below).



### Extended Debye model.

$$\chi_M' = \chi_s + (\chi_T - \chi_s) \frac{1 + (\omega\tau)^{1-\alpha} \sin\left(\alpha \frac{\pi}{2}\right)}{1 + 2(\omega\tau)^{1-\alpha} \sin\left(\alpha \frac{\pi}{2}\right) + (\omega\tau)^{2-2\alpha}}$$

$$\chi_M'' = (\chi_T - \chi_s) \frac{(\omega\tau)^{1-\alpha} \cos\left(\alpha \frac{\pi}{2}\right)}{1 + 2(\omega\tau)^{1-\alpha} \sin\left(\alpha \frac{\pi}{2}\right) + (\omega\tau)^{2-2\alpha}}$$

With  $\chi_T$  the isothermal susceptibility,  $\chi_s$  the adiabatic susceptibility,  $\tau$  the relaxation time and  $\alpha$  an empiric parameter which describe the distribution of the relaxation time. For SMM with only one relaxing object  $\alpha$  is close to zero. The extended Debye model was applied to fit simultaneously the experimental variations of  $\chi_M'$  and  $\chi_M''$  with the frequency  $\nu$  of the oscillating field ( $\omega = 2\pi\nu$ ). Typically, only the temperatures for which a maximum on the  $\chi_M''$  vs.  $\nu$  curves, have been considered (see Fig. S10 for an example). The best fitted parameters  $\tau$ ,  $\alpha$ ,  $\chi_T$ ,  $\chi_s$  in the range 2-7 K are listed in Table S4 with the coefficient of determination  $R^2$ .

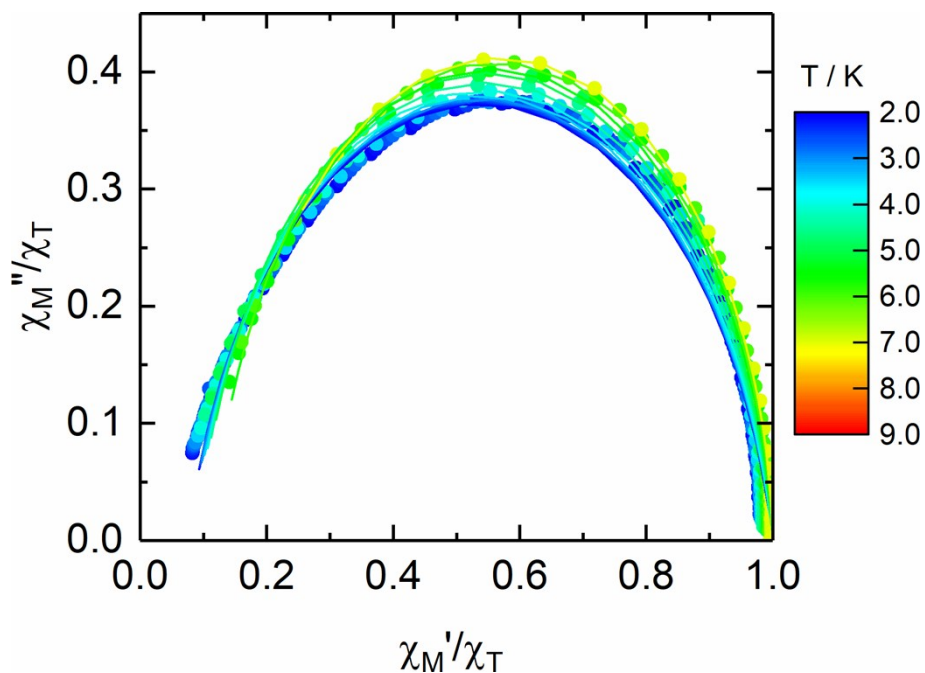

**Fig. S11** Normalized Cole-Cole plots for **1** at several temperatures between 2 and 7K.

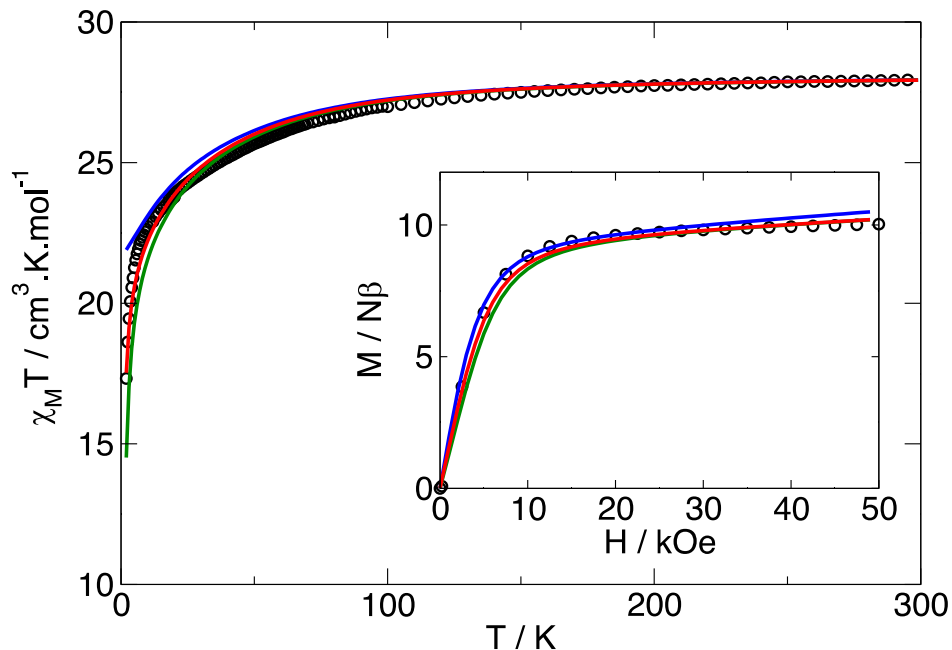

**Fig. S12** Thermal evolution of the molar magnetic susceptibility in function of the temperature and  $M$  vs  $H$  curves at 2 K (inset) for **1**. The dark dots represent experimental results while solid lines correspond to calculated data considering isolated Dy centers (blue), only the dipolar interactions (green) and both dipolar and exchange contributions for a fitting exchange term  $J^{\text{exch}} = 0.04 \text{ cm}^{-1}$ , in the Lines model (red).

### Mapping of the molecular electrostatic potential.

The molecular electrostatic potential is mapped and represented using the home-made **CAMMEL** code (**C**ALculated **M**olecular **M**ultipolar **E**lectrostatics).

$$V(r_i) = \sum_i^N \frac{q_i}{|r_i - r|} + \frac{p_i \cdot r_i}{|r_i - r|^3} + \frac{r_i \cdot (Q_i \times r_i)}{|r_i - r|^5}$$

where  $q_i$ ,  $p$ ,  $Q_i$  are respectively the charge, dipole and quadrupole moments of the  $i$ -th atom. The potential is drawn on a sphere defined by the user around the central lanthanide ion, for a given state (ground state in this case). For a clearer representation of the potential, the intensity can be directly related to both the color (red = high potential and blue = low potential) and the height of the irregularities.



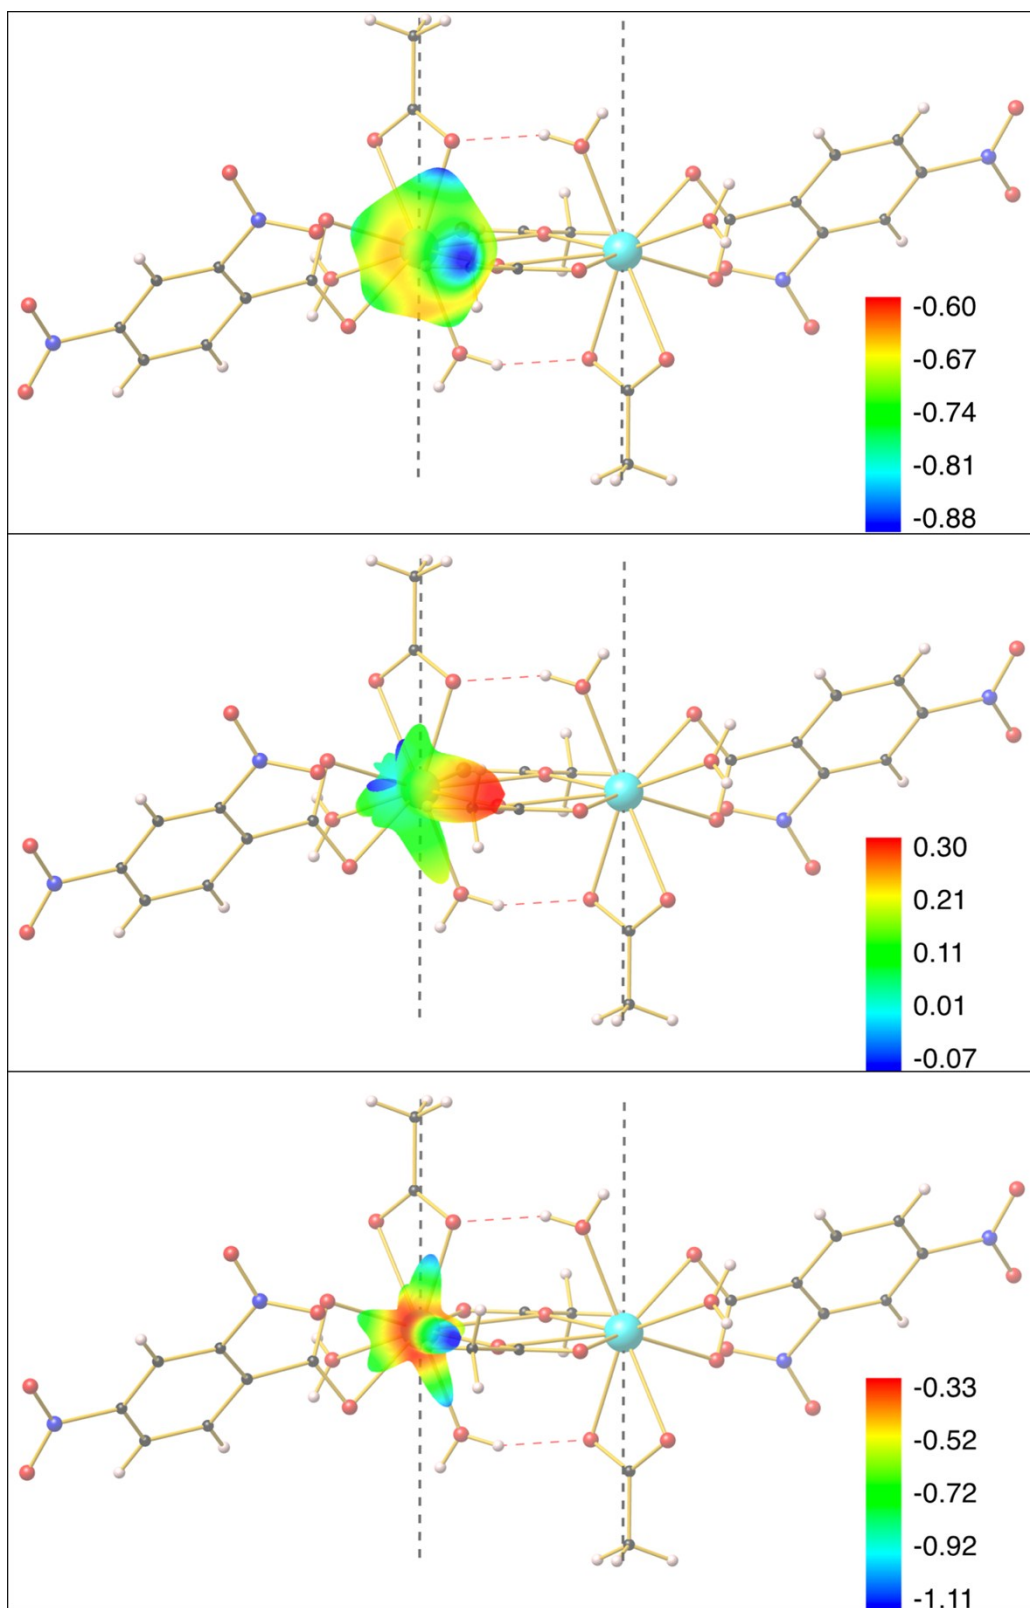

**Fig. S13** Representation of the charge (top), dipole (middle) and quadrupole (bottom) components of the electrostatic potential mapped around one of the magnetic center.

**Table S1.** Selected bond lengths and angles for **1**.

|               |           |
|---------------|-----------|
| O1 -Dy1       | 2.475(2)  |
| O2 -Dy1       | 2.472(2)  |
| O7 -Dy1       | 2.493(2)  |
| O8 -Dy1       | 2.366(2)  |
| O9 -Dy1       | 2.329(2)  |
| O10- Dy1      | 2.411(2)  |
| O1W- Dy1      | 2.339(2)  |
| O2W- Dy1      | 2.347(2)  |
| O9 -Dy1 -O2W  | 77.95(8)  |
| O9- Dy1 -O1W  | 154.58(7) |
| O2W -Dy1- O1W | 83.49(8)  |
| O9 -Dy1- O8   | 74.81(7)  |
| O2W-Dy1- O8   | 143.02(8) |
| O1W -Dy1 -O8  | 128.97(7) |
| O9- Dy1 -O10  | 116.23(7) |
| O2W -Dy1- O10 | 78.60(10) |
| O1W- Dy1- O10 | 76.22(8)  |
| O8- Dy1 -O10  | 91.49(8)  |
| O9 -Dy1- O2   | 96.05(8)  |
| O2W -Dy1 -O2  | 127.83(8) |
| O1W- Dy1- O2  | 81.71(9)  |
| O8- Dy1 -O2   | 79.92(7)  |
| O10 -Dy1- O2  | 143.23(8) |
| O9- Dy1- O1   | 85.41(7)  |
| O2W- Dy1 -O1  | 75.25(8)  |
| O1W -Dy1- O1  | 73.07(7)  |
| O8- Dy1 -O1   | 126.12(8) |
| O10 -Dy1- O1  | 141.41(8) |
| O2- Dy1- O1   | 52.58(7)  |
| O9-Dy1- O7    | 127.88(7) |
| O2W -Dy1- O7  | 147.15(8) |
| O1W- Dy1- O7  | 76.19(7)  |
| O8- Dy1 -O7   | 53.12(7)  |
| O10 -Dy1- O7  | 71.70(8)  |
| O2- Dy1- O7   | 74.70(8)  |
| O1- Dy1- O7   | 121.42(8) |
| O9- Dy1 -O9   | 66.22(8)  |
| O2W- Dy1- O9  | 72.27(7)  |
| O1W- Dy1- O9  | 124.00(8) |
| O8 -Dy1- O9   | 74.08(7)  |
| O10- Dy1- O9  | 50.24(6)  |

|             |           |
|-------------|-----------|
| O2- Dy1- O9 | 151.52(7) |
| O1- Dy1- O9 | 140.38(7) |
| O7-Dy1-O9   | 98.09(7)  |

**Table S2.** Selected bond lengths for intra- and inter-molecular H-bonding involving hydrogens of water and oxygens of acetate groups.

| X-H...Y                     | X...Y    | H...Y | $\angle$ X-H...Y |
|-----------------------------|----------|-------|------------------|
| O1W-H12W...O7 <sup>1</sup>  | 2.739(2) | 1.92  | 176              |
| O1W-H11W...O1 <sup>2</sup>  | 2.835(2) | 2.03  | 177              |
| O2W-H21W...O10 <sup>3</sup> | 2.685(2) | 1.84  | 180              |
| C9-H9C...O6 <sup>4</sup>    | 3.347(2) | 2.46  | 153              |

(1)  $-x+1/2+1, +y+1/2, +z$  (2)  $x, +y-1, +z$  (3)  $-x+1/2+1, +y-1/2, +z$  (4)  $x-1/2, +y-1, -z+1/2$

**Table S3** Best fitted parameters ( $\chi_T$ ,  $\chi_S$ ,  $\tau$  and  $\alpha$ ) with the extended Debye model for **1** at 0 Oe in the temperature range 2-7 K.

| T / K | $\chi_T / \text{cm}^3 \text{mol}^{-1}$ | $\chi_S / \text{cm}^3 \text{mol}^{-1}$ | $\alpha$ | $\tau / \text{s}$ | R <sup>2</sup> |
|-------|----------------------------------------|----------------------------------------|----------|-------------------|----------------|
| 2     | 4.25884                                | 0.32318                                | 0.13526  | 0.00347           | 0.99913        |
| 2.2   | 4.0277                                 | 0.30648                                | 0.13272  | 0.00337           | 0.99914        |
| 2.4   | 3.76853                                | 0.28782                                | 0.13109  | 0.00325           | 0.99913        |
| 2.6   | 3.55173                                | 0.27346                                | 0.12942  | 0.00314           | 0.99914        |
| 2.8   | 3.35666                                | 0.26154                                | 0.12769  | 0.00304           | 0.99913        |
| 3     | 3.18158                                | 0.25056                                | 0.12611  | 0.00294           | 0.99913        |
| 3.5   | 2.81514                                | 0.23017                                | 0.12023  | 0.00267           | 0.99919        |
| 4     | 2.51788                                | 0.21522                                | 0.11063  | 0.00236           | 0.99924        |
| 4.5   | 2.27835                                | 0.20489                                | 0.09619  | 0.002             | 0.99927        |
| 5     | 2.06923                                | 0.19515                                | 0.08024  | 0.0016            | 0.99955        |
| 5.5   | 1.95545                                | 0.22717                                | 0.05922  | 0.00126           | 0.99977        |
| 6     | 1.8053                                 | 0.21616                                | 0.04742  | 9.13359E-4        | 0.99987        |
| 7     | 1.57089                                | 0.21012                                | 0.03069  | 4.2403E-4         | 0.99997        |

**Table S4:** Computed energy levels (the ground state is set at zero) and main component of the  $g$ -tensor ( $g_z$ , transversal components are  $g_x = g_y = 0$ ) for each state for **1** taking into account the dipolar interaction between the Dy centers.

| KD | Energy (cm <sup>-1</sup> ) | $g_z$ |
|----|----------------------------|-------|
| 1  | 0.0                        | 0.00  |
| 2  | 1.0                        | 37.12 |
| 3  | 41.0                       | 0.34  |
| 4  | 41.2                       | 0.34  |
| 5  | 41.7                       | 32.17 |
| 6  | 41.8                       | 32.15 |
| 7  | 81.9                       | 0.00  |
| 8  | 82.7                       | 32.85 |
